# Supplementary material for: Investigation into the enantiospecific behavior of trichlorfon enantiomers during microorganism degradation
Source: Royal Society of Chemistry journal article supplement (doi:10.1039/c5ra17702b), 2015-12-28
Supplement: c5ra17702b1.pdf [file c5ra17702b1.pdf]

## **SUPPLEMENTARY MATERIAL**

### **Investigation into the enantiospecific behavior of trichlorfon enantiomers during microorganism degradation**

Jing Nie<sup>b</sup>, Li-Ye Yang<sup>b</sup>, Xiao-kun OuYang<sup>a,b\*</sup>, Wei-Jian Wu<sup>b</sup>, Yang-Guang Wang<sup>a,b\*</sup>,

Di Yu<sup>b</sup>

<sup>a</sup>Key Laboratory of Health Risk Factors for Seafood of Zhejiang Province, Zhejiang  
Ocean University, Zhoushan 316022, P.R. China

<sup>b</sup>School of Food and Pharmacy, Zhejiang Ocean University, Zhoushan 316022, P.R.  
China

\*Corresponding Author. Tel.:+86-580-2554781. Fax: +86-580-2554781. E-mail:  
xkouyang@zjou.edu.cn (Xiao-kun OuYang) or ygw0510@sohu.com (Yang-Guang  
Wang)

## TABLES

**Table S1. Effect of extraction volume on trichlorfon enantiomer recovery**

| Extraction<br>volume<br>(mL) | Recovery (%) $\pm$ SD |                  |                  |
|------------------------------|-----------------------|------------------|------------------|
|                              | <i>S</i> -(+)-TF      | <i>R</i> -(-)-TF | dichlorvos       |
| 10                           | 69.41 $\pm$ 9.38      | 60.44 $\pm$ 6.39 | 77.90 $\pm$ 2.98 |
| 15                           | 91.69 $\pm$ 4.70      | 92.69 $\pm$ 3.41 | 99.77 $\pm$ 1.87 |
| 20                           | 91.00 $\pm$ 3.07      | 91.18 $\pm$ 5.90 | 99.55 $\pm$ 1.11 |

**Table S2. EF values of the trichlorfon enantiomers**

| Analyte         | Spiked amount<br>( $\mu\text{g/g}$ ) | EF values             |                       |
|-----------------|--------------------------------------|-----------------------|-----------------------|
|                 |                                      | Intraday <sup>b</sup> | Interday <sup>c</sup> |
| TF <sup>a</sup> | 0.12                                 | 0.5                   | 0.5                   |
|                 | 0.30                                 | 0.5                   | 0.5                   |
|                 | 0.80                                 | 0.5                   | 0.5                   |

<sup>a</sup> *S*-(+)-TF spiked amounts were 0.06/0.15/0.40  $\mu\text{g/g}$ ; *R*-(-)-TF spiked amounts were 0.06/0.15/0.40  $\mu\text{g/g}$ ; <sup>b</sup> n = 5; <sup>c</sup> n = 5 replicates  $\times$  5 d within a 14 d period.

## FIGURES

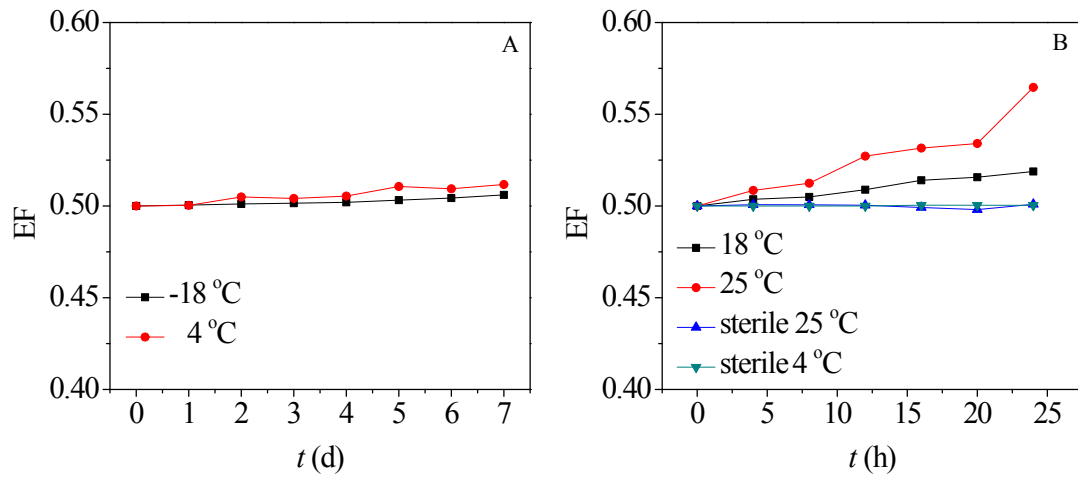

**Figure S1.** (A) EF values at  $-18\text{ }^{\circ}\text{C}$  and  $4\text{ }^{\circ}\text{C}$  (unsterilized conditions). (B) EF values at  $18\text{ }^{\circ}\text{C}$  and  $25\text{ }^{\circ}\text{C}$  (unsterilized conditions) and  $4\text{ }^{\circ}\text{C}$  and  $25\text{ }^{\circ}\text{C}$  (sterile conditions).
